# Supplementary material for: In situ growth of α-Fe2O3 nanorod arrays on 3D carbon foam as an efficient binder-free electrode for highly sensitive and specific determination of nitrite
Source: Royal Society of Chemistry journal article supplement (doi:10.1039/c6ta10744c), 2017-01-01
Supplement: c6ta10744c1.pdf [file c6ta10744c1.pdf]

# In-situ growth of $\alpha$ -Fe<sub>2</sub>O<sub>3</sub> nanorod arrays on 3D carbon foam as an efficient binder-free electrode for highly sensitive and specific determination of nitrite

Yue Ma,<sup>a,b</sup> Xiangyang Song,<sup>a,b</sup> Xiao Ge,<sup>a,b</sup> Haimin Zhang,<sup>a</sup> Guozhong Wang,<sup>a</sup> Yunxia Zhang<sup>a,\*</sup>  
and Huijun Zhao<sup>a,c</sup>

<sup>a</sup> Key Laboratory of Materials Physics, Centre for Environmental and Energy Nanomaterials,  
Anhui Key Laboratory of Nanomaterials and Nanotechnology,  
CAS Center for Excellence in Nanoscience, Institute of Solid State Physics, Chinese Academy of  
Sciences, Hefei 230031, China.

<sup>b</sup> University of Science and Technology of China, Hefei 230026, P. R. China

<sup>c</sup> Centre for Clean Environment and Energy, Gold Coast Campus, Griffith University, Queensland  
4222, Australia.

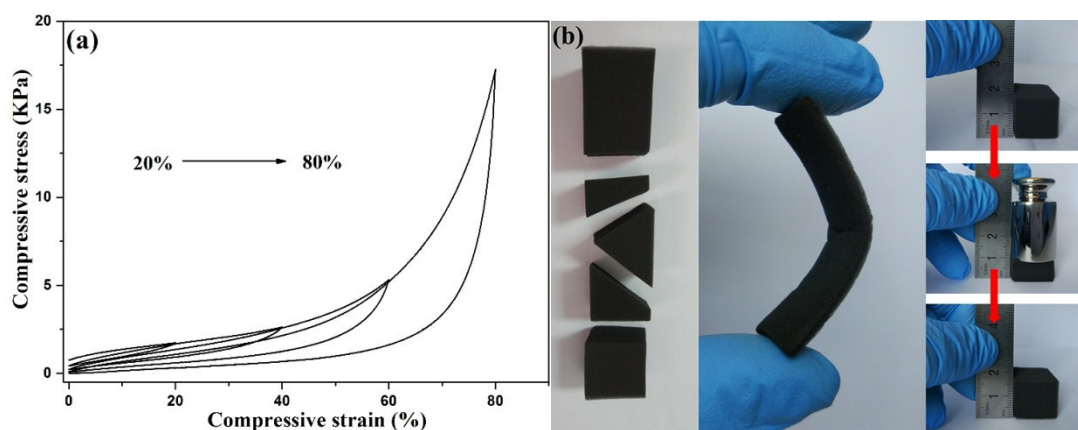

**Fig. S1** (a) Compressive stress–strain curves of CF at strain values of 20, 40, 60, and 80%; (b) Digital photograph of different shapes and sizes of the obtained 3D CF, indicating the high flexibility of the obtained CF samples.

\* Correspondence Author. Email: [yxzhang@issp.ac.cn](mailto:yxzhang@issp.ac.cn)  
Fax: +86-551-65591434; Tel: +86-551-65592145

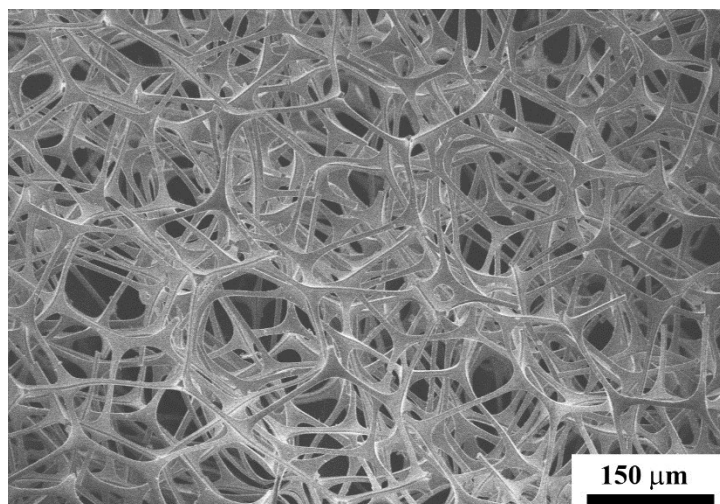

**Fig. S2** SEM image of MF sponge.

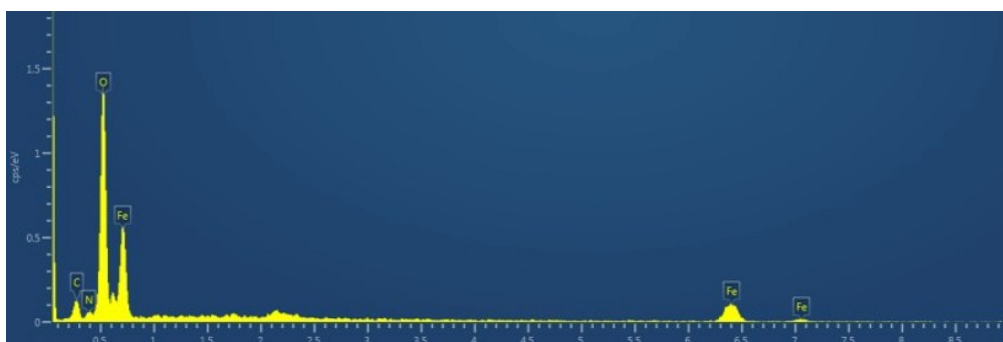

**Fig. S3** EDS spectrum of the as-prepared  $\alpha$ -Fe<sub>2</sub>O<sub>3</sub> NAs/CF.

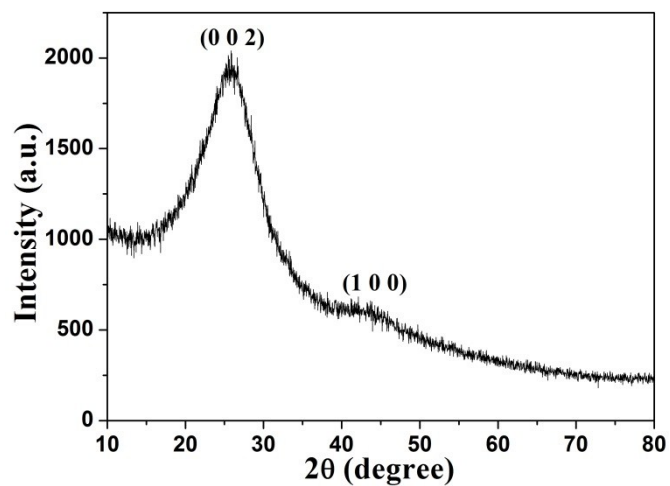

Fig. S4 XRD pattern of the as-prepared CF sample.

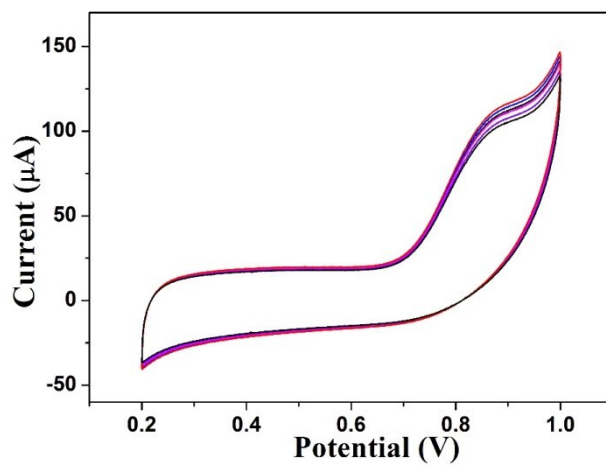

Fig. S5 Cyclic voltammograms of six different  $\alpha$ -Fe<sub>2</sub>O<sub>3</sub> NAs/CF electrodes in the presence of 1000  $\mu$ M NaNO<sub>2</sub> in N<sub>2</sub>-saturated 0.1 M PBS at a scan rate of 50 mV/s.

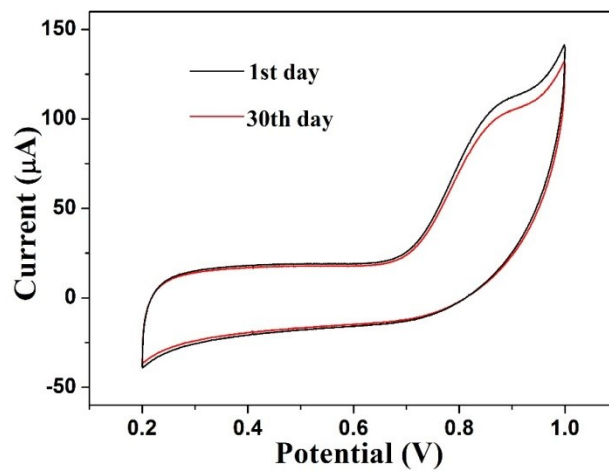

**Fig. S6** Cyclic voltammograms of a  $\alpha\text{-Fe}_2\text{O}_3$  NAs/CF electrode before and after 30 days of storage in presence of  $1000 \mu\text{M NaNO}_2$  in  $\text{N}_2$ -saturated  $0.1 \text{ M PBS}$  at a scan rate of  $50 \text{ mV/s}$ .
